# Supplementary material for: Quantitative Proteomics of Hepatic Drug‐Metabolizing Enzymes and Transporters in Patients With Colorectal Cancer Metastasis
Source: PubMed Central journal article supplement — Clin Pharmacol Ther. 2022 May 21;112(3):699–710. doi: 10.1002/cpt.2633 (PMC9540503; doi:10.1002/cpt.2633), 2022-05-21
Supplement: CPT-112-699-s001.pdf [file CPT-112-699-s001.pdf]

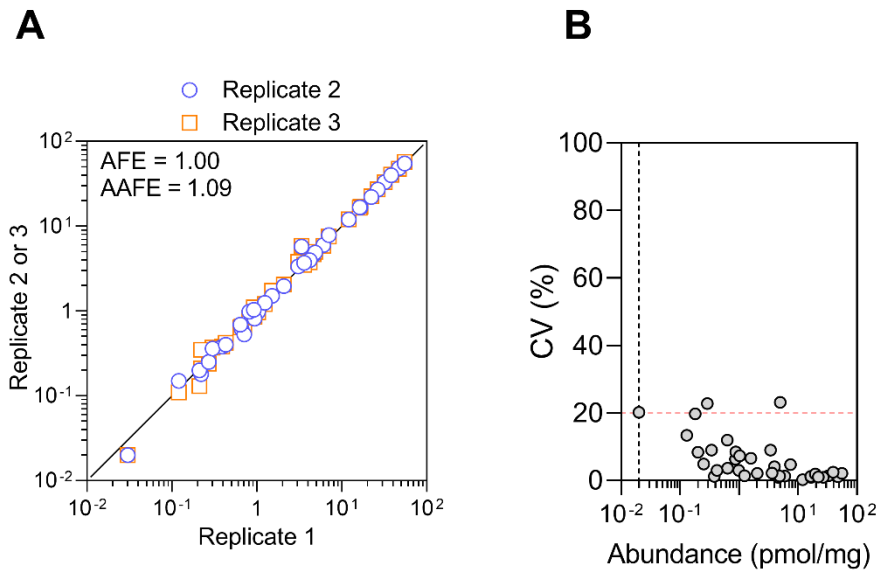

**Figure S3.** Technical evaluation of proteomic measurements. Precision (AFE) and accuracy (AAFE) of replicate measurements (**A**) and technical variability (**B**) of CYPs, UGTs, ABCs and SLCs. Variability is represented by percent coefficient of variations (CV%) used to define the lower limit of quantification (LLOQ). AFE, average fold error; AAFE, absolute average fold error.
