# Supplementary material for: Quantitative Proteomics of Hepatic Drug‐Metabolizing Enzymes and Transporters in Patients With Colorectal Cancer Metastasis
Source: PubMed Central journal article supplement — Clin Pharmacol Ther. 2022 May 21;112(3):699–710. doi: 10.1002/cpt.2633 (PMC9540503; doi:10.1002/cpt.2633), 2022-05-21
Supplement: CPT-112-699-s003.pdf [file CPT-112-699-s003.pdf]

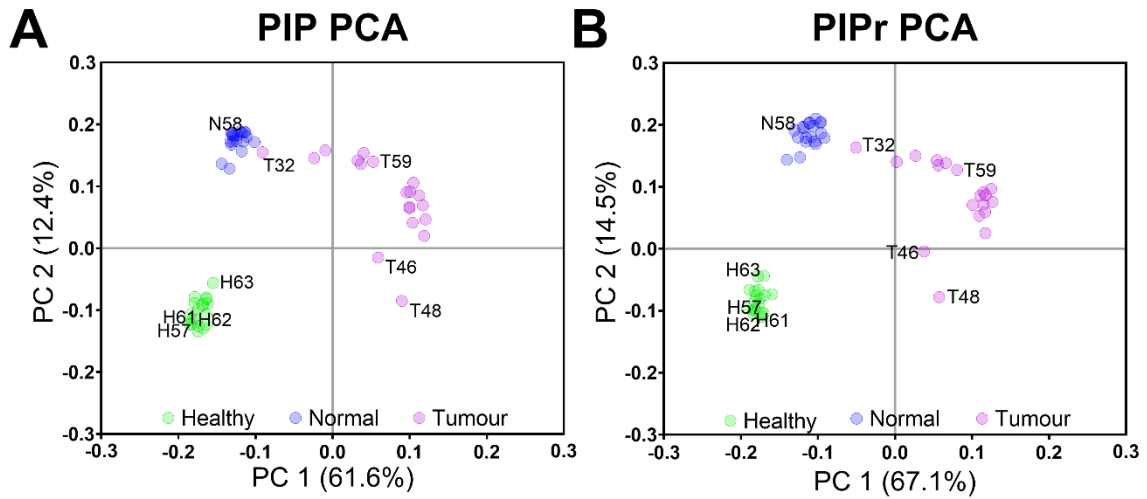

**Figure S1.** Principal components analysis (PCA) of peptide (A) and protein (B) similarity data. Analysis was based on percentage identical peptide (PIP) and percentage identical protein (PIPr) values, respectively.
