# Supplementary material for: Quantitative Proteomics of Hepatic Drug‐Metabolizing Enzymes and Transporters in Patients With Colorectal Cancer Metastasis
Source: PubMed Central journal article supplement — Clin Pharmacol Ther. 2022 May 21;112(3):699–710. doi: 10.1002/cpt.2633 (PMC9540503; doi:10.1002/cpt.2633), 2022-05-21
Supplement: CPT-112-699-s004.pdf [file CPT-112-699-s004.pdf]

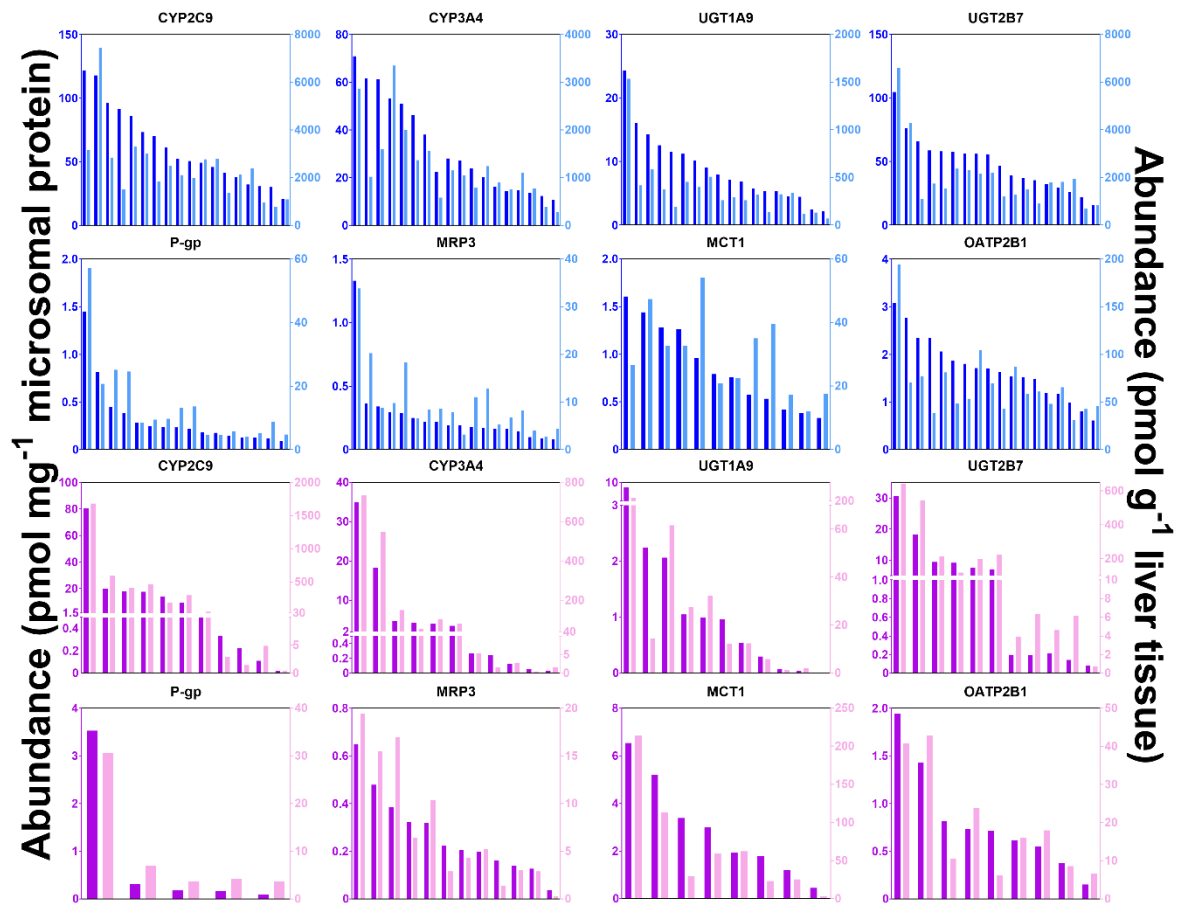

**Figure S2.** Abundance of CYP2C9, CYP3A4, UGT1A9, UGT2B7, P-gp, MRP3, MCT1, and OATP2B1 in histologically normal (graphs on the top, blue bars) and tumour (graphs at the bottom, purple bars). Abundance is expressed in pmol of target protein per mg of microsomal protein on the left y-axis (darker bars), and as pmol of target protein per g of liver on the right y-axis (lighter bars).
